# Supplementary material for: Rosa platyacantha Schrenk from Kazakhstan—Natural Source of Bioactive Compounds with Cosmetic Significance
Source: MDPI journal article supplement (doi:10.3390/molecules26092578), 2021-04-28
Supplement: s1 [file s1]

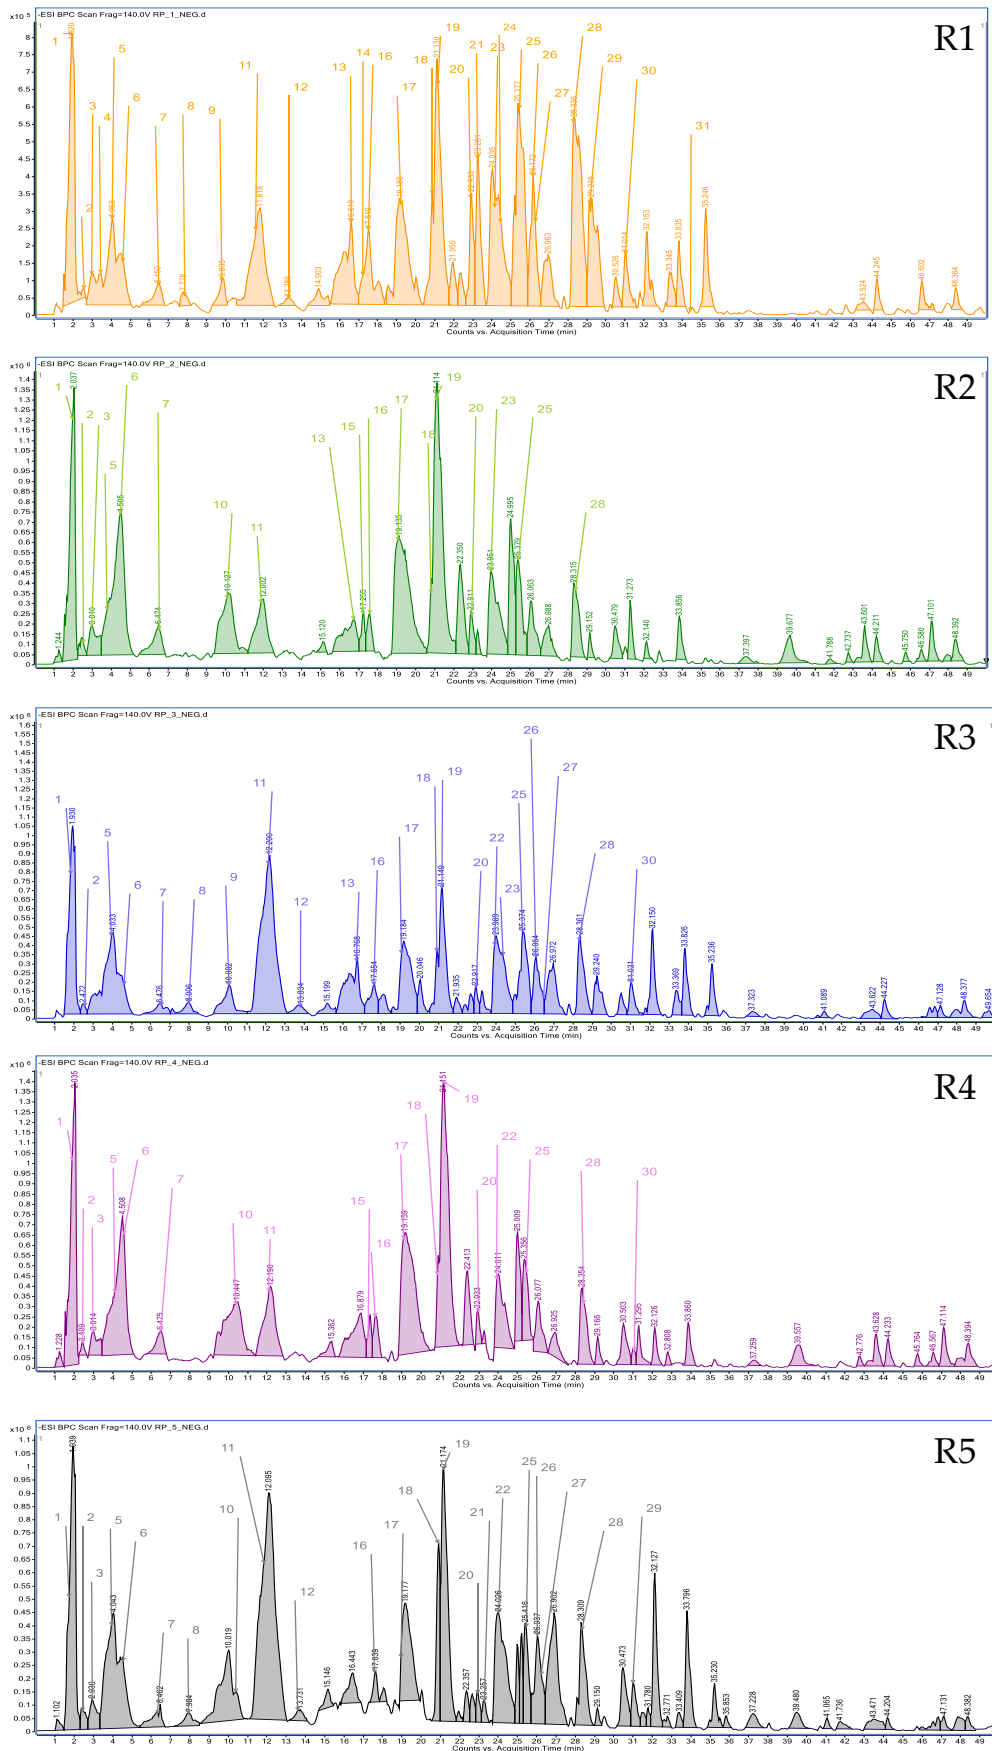

**Figure S1.** The TIC chromatogram recorded in the negative ionization modes for the *R. platyacantha* extracts R1-R5.

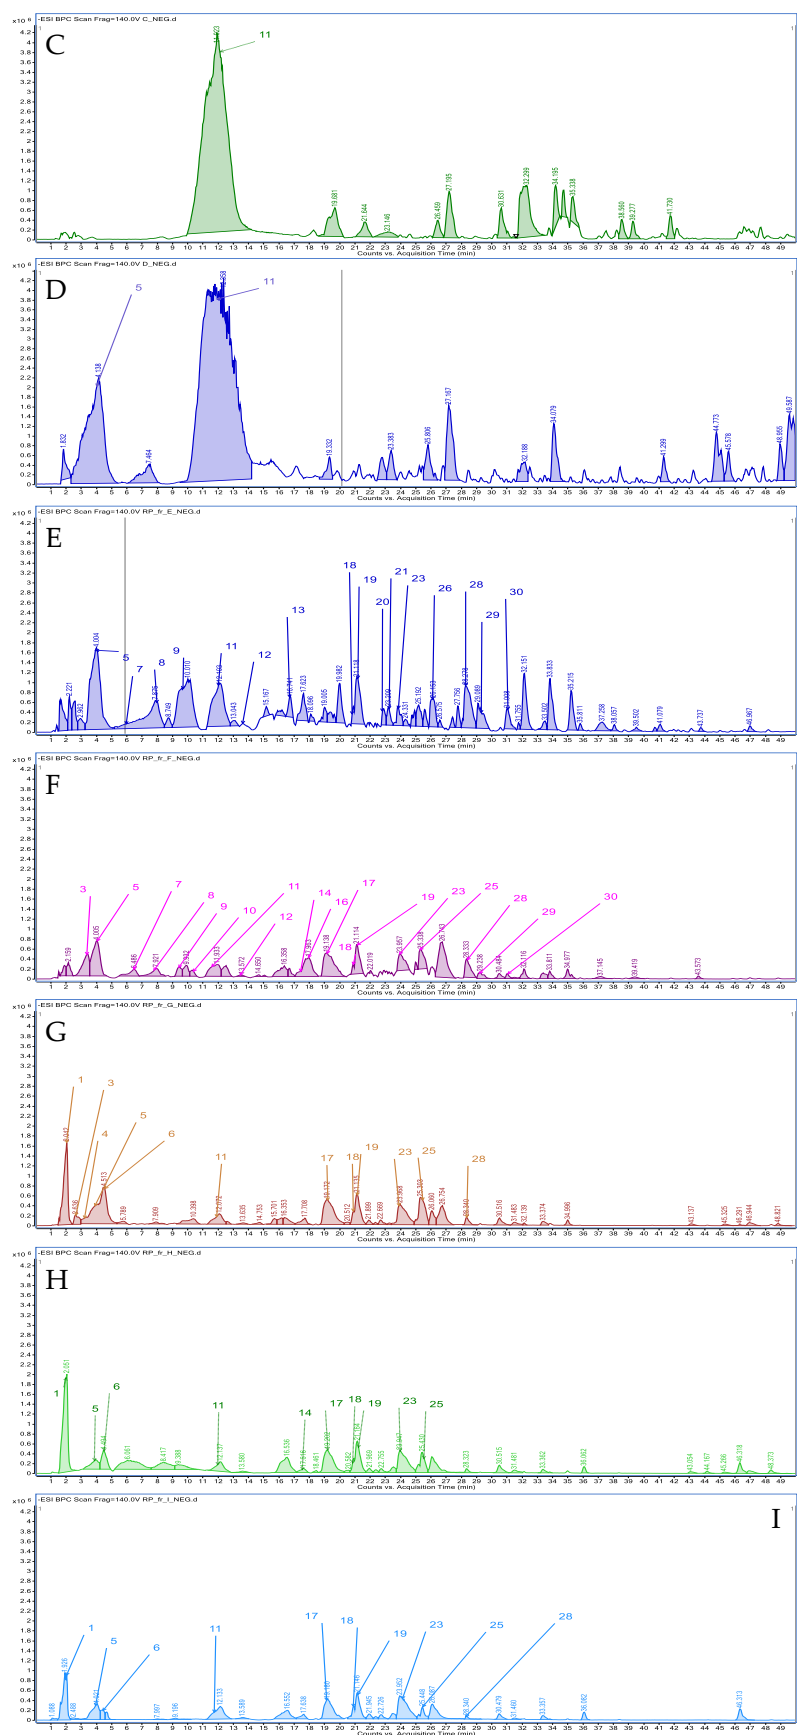

**Figure S2.** The TIC chromatogram recorded in the negative ionization modes for the fractions obtained from *R. platyacantha* extract R3.
